# Supplementary material
Source: PubMed Central journal article supplement (PMC5972908)
Supplement: JVI.01633-17_zjv006183397s1.pdf [file JVI.01633-17_zjv006183397s1.pdf]

### DATASET S1 Nef and Vpu amino acid alignment of viruses phenotyped in this study.

The alignment demonstrates substantial sequence variation. Numbering is based on the subtype C LANL consensus (shown as "C"), which is similar to HXB2 numbering. Amino acids that differ from the subtype C consensus are shown in color throughout the alignment, while dots are positions that match the consensus sequence. Dashes represent the absence of an amino acid at that position. Arrows point to significant positions found from Sequence Harmony analysis shown in Table 1, some of which are displayed in Figure 5.

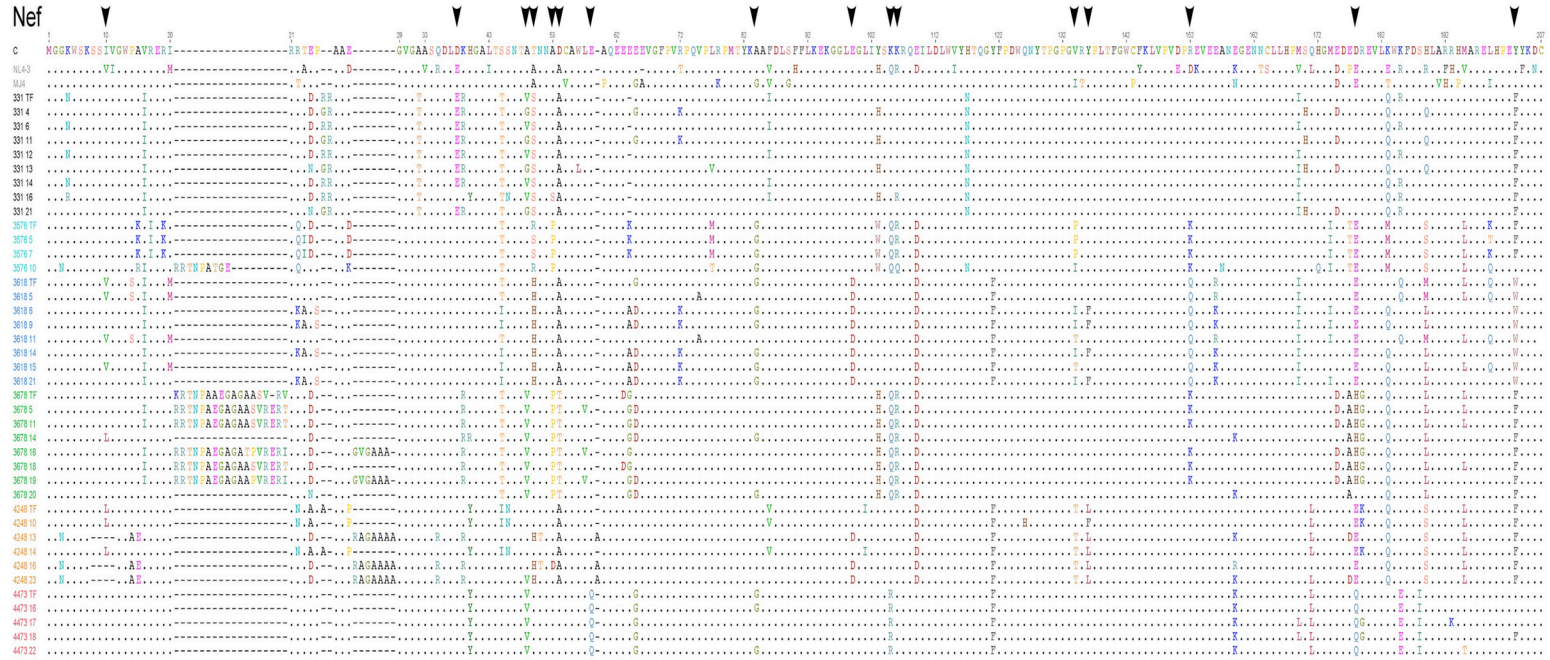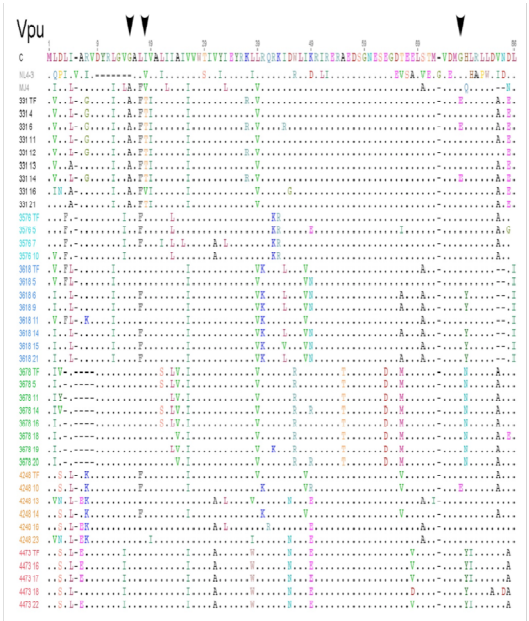

Figure S1

Correcting for replicative capacity score did not alter the correlation between HLA-C downregulation and NK suppression.

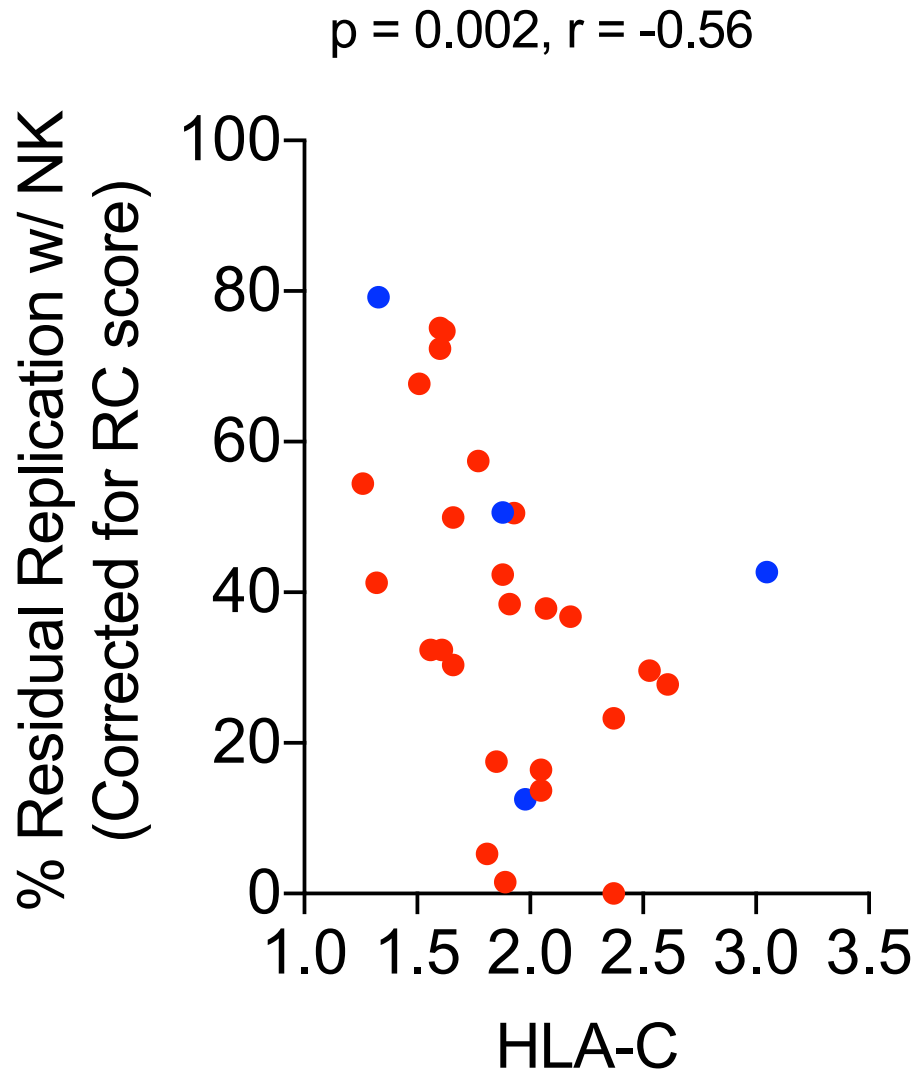

Table S1 Genbank accession numbers prviously published and listed here for ease of access

| Variant ID | Genbank accession numbers |
|------------|---------------------------|
| 331 4      | KR820308                  |
| 331 6      | KR820310                  |
| 331 11     | KR820294                  |
| 331 12     | KR820295                  |
| 331 13     | KR820296                  |
| 331 14     | KR820297                  |
| 331 16     | KR820299                  |
| 331 21     | KR820303                  |
| 331 TF     | KR820323                  |
| 3576 5     | KR820336                  |
| 3576 7     | KR820338                  |
| 3576 10    | KR820326                  |
| 3576 TF    | KR820325                  |
| 3618 5     | KR820354                  |
| 3618 6     | KR820355                  |
| 3618 9     | KR820357                  |
| 3618 11    | KR820342                  |
| 3618 14    | KR820344                  |
| 3618 15    | KR820345                  |
| 3618 21    | KR820351                  |
| 3618 TF    | KR820366                  |
| 3678 5     | KR820384                  |
| 3678 11    | KR820369                  |
| 3678 14    | KR820371                  |
| 3678 16    | KR820373                  |
| 3678 18    | KR820375                  |
| 3678 19    | KR820376                  |
| 3678 20    | KR820377                  |
| 3678 TF    | KR820393                  |
| 4248 10    | KR820395                  |
| 4248 13    | KR820398                  |
| 4248 14    | KR820399                  |
| 4248 16    | KR820401                  |
| 4248 23    | KR820407                  |
| 4248 TF    | KR820421                  |
| 4473 16    | KR820428                  |
| 4473 17    | KR820429                  |
| 4473 18    | KR820430                  |
| 4473 22    | KR820434                  |
| 4473 TF    | KR820449                  |
